# Supplementary material for: Auger Emitter Conjugated PARP Inhibitor for Therapy in Triple Negative Breast Cancers: A Comparative In-Vitro Study
Source: MDPI journal article supplement (doi:10.3390/cancers14010230), 2022-01-04
Supplement: s1 [file s1]

## SUPPORTING INFORMATION

for

# Auger-emitter conjugated PARP inhibitor for therapy in triple negative breast cancers: a comparative in-vitro study

Ramya Ambur Sankaranarayanan<sup>1</sup>, Jennifer Peil<sup>1</sup>, Andreas T.J. Vogg<sup>1</sup>, Carsten Bolm<sup>2</sup>, Steven Terhorst<sup>2</sup>, Arno Classen<sup>2</sup>, Matthias Bauwens<sup>1,3,4</sup>, Jochen Maurer<sup>5</sup>, Felix Mottaghy<sup>1,3</sup>, Agnieszka Morgenroth<sup>1\*</sup>.

1. Department of Nuclear Medicine, University Hospital Aachen, RWTH Aachen University, Germany.
2. Institute of Organic Chemistry, RWTH Aachen University, Germany
3. Department of Radiology and Nuclear Medicine, Maastricht University Medical Center (MUMC+), Maastricht, The Netherlands
4. Research School NUTRIM, Maastricht University, Universiteitssingel 50, 6229 ER, Maastricht, The Netherlands.
5. Department of Molecular Gynecology, University Hospital Aachen, RWTH Aachen University, Germany.

\*Correspondence: amorgenroth@ukaachen.de.

## Table of Content

|                                                                                                                        |        |
|------------------------------------------------------------------------------------------------------------------------|--------|
| 1. Chemistry – Syntheses and Analyses                                                                                  | S2-3   |
| 1.1 Synthesis of 4-{3'-[4''-(4'''-iodobenzoyl)piperazine-1''-carbonyl]-4'-fluorobenzyl}-2H-phthalazin-1-one            | S2     |
| 1.2 Synthesis of 4-{3'-[4''-(4'''-tributylstannylbenzoyl)piperazine-1''-carbonyl]-4'-fluorobenzyl}-2H-phthalazin-1-one | S2-3   |
| 1.3. NMR spectra with supplementary figures S1A-D                                                                      | S4-5   |
| 2. Supplementary Figures                                                                                               | S6-18  |
| Fig. S2A: Quality control of [ <sup>125</sup> I]-PARPi-01 using gradient Reverse Phase HPLC                            | S6     |
| Fig. S2B: Comparison of <sup>125</sup> I vs [ <sup>125</sup> I]-PARPi-01 in TLC                                        | S7     |
| 1.3. Fig. S3A: Western blot analysis of PARP1 expression                                                               | S8     |
| 1.4. Fig. S3B: Phosphorimager analysis of radioactivity in nuclear lysates                                             | S9     |
| 1.5. Fig. S4: Immunofluorescence microscopy of PARP1 expression                                                        | S10    |
| 1.6. Fig. S5: Immunofluorescence microscopy of BT20 cells                                                              | S10    |
| 1.7. Fig. S6: Comparison of cell cycle phases                                                                          | S11-13 |
| 1.8. Fig. S7: Comparison of early and late apoptotic populations and live cell population                              | S14-16 |
| 1.9. Fig. S8: Images of colony formation of cell-lines                                                                 | S17-18 |

## 1. Chemistry – Syntheses and Analyses

### 1.1. Synthesis of 4-{3'-[4''-(4'''-iodobenzoyl)piperazine-1''-carbonyl]-4'-fluorobenzyl}-2H-phthalazin-1-one

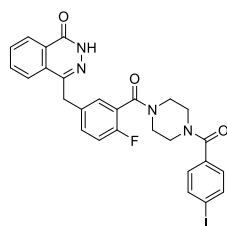

The known compound (F. Zmuda, G. Malviya, A. Blair, M. Boyd, A. J. Chalmers, A. Sutherland, S. L. Pimlott, *J. Med. Chem.* **2015**, 58, 8683-8693) was prepared by a modified synthetic protocol.

4-[4-Fluoro-3-(piperazine-1-carbonyl)benzyl]phthalazin-1(2H)-one (60 mg, 0.164 mmol, 1 equiv.), 4-iodobenzoic acid (40.7 mg, 0.164 mmol, 1 equiv.), *N,N'*-dicyclohexylcarbodiimide (DCC, 37.1 mg, 0.18 mmol, 1.1 equiv.) and 4-dimethylaminopyridine (DMAP, 2 mg, 0.016 mmol, ca. 10 mol%) were used in a typical DCC-coupling reaction with acetonitrile (2 mL) as solvent at room temperature. After completion of the reaction (as indicated by TLC, 16 h), the mixture was diluted with DCM, neutralized with diluted sodium bicarbonate solution and washed with water (3 times). The organic phase was dried over magnesium sulfate and concentrated under reduced pressure. The product was purified by column chromatography (EtOAc 100%) and obtained as a colorless powder in 85% yield (84.2 mg).

$^1\text{H}$  NMR (600 MHz, Chloroform-*d*)  $\delta$  11.57 (s, 1H), 8.59 – 8.23 (m, 1H), 7.82 – 7.67 (m, 5H), 7.33 (d,  $J$  = 6.0 Hz, 2H), 7.13 (d,  $J$  = 6.1 Hz, 2H), 7.02 (s, 1H), 4.28 (s, 2H), 3.83 – 3.20 (m, 8H).  $^{13}\text{C}$  NMR (151 MHz, Chloroform-*d*)  $\delta$  169.7, 165.2, 161.0, 156.9 (d,  $J$  = 247.4 Hz), 145.6, 137.8, 134.5 (d,  $J$  = 3.2 Hz), 134.4, 133.7, 131.8 (d,  $J$  = 7.8 Hz), 131.6, 129.5, 129.3 (d,  $J$  = 3.6 Hz), 128.8, 128.2, 127.2, 125.0, 123.5 (d,  $J$  = 17.8 Hz), 116.2 (d,  $J$  = 21.8 Hz), 96.5, 47.3, 42.2, 37.7.

### 1.2. Synthesis of 4-{3'-[4''-(4'''-tributylstannylbenzoyl)piperazine-1''-carbonyl]-4'-fluorobenzyl}-2H-phthalazin-1-one

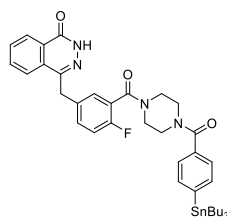

A protocol for the synthesis of an isomeric product (as reported in t. C. Wilson, S. A. Jannetii, N. Guru, N. Pillarsetty, T. Reiner, G. Pirovano, *Int. J. Radiation Biol.*, DOI 10.1080/09553002.2020.1781283) was adopted and modified.

To a solution of 4-[4-fluoro-3-(piperazine-1-carbonyl)benzyl]phthalazin-1(2H)-one (30 mg, 0.0819 mmol, 1 equiv.) and 2-(1*H*-benzotriazol-1-yl)-1,1,3,3-tetramethyluronium hexafluorophosphate (HBTU, 48 mg, 0.123 mmol, 1.5 equiv.) in acetonitrile (1.5 mL), 1-[4-(tributylstannyl)benzoyl]-pyrrolidine-2,5-dione (41.6 mg, 0.0819 mmol, 1 equiv.) was added at 30 °C. After stirring for 3 h at 30 °C and 16 h at room temperature, the mixture was diluted with water and washed with DCM (3 times). The combined organic phases were dried over magnesium sulfate and concentrated under reduced

pressure. The product was purified by column chromatography (ethyl acetate/cyclohexane 5:1) and obtained as an oil in 39% yield (24.2 mg).

$^1\text{H}$  NMR (600 MHz, Chloroform- $d$ )  $\delta$  11.08 (s, 1H), 8.46 (dd,  $J$  = 6.9, 2.2 Hz, 1H), 7.96 – 7.66 (m, 3H), 7.50 (s, 2H), 7.40 – 7.27 (m, 4H), 7.03 (s, 1H), 4.29 (s, 2H), 3.87 – 3.19 (m, 8H), 1.52 (t,  $J$  = 8.1 Hz, 6H), 1.32 (q,  $J$  = 7.4 Hz, 6H), 1.05 (t,  $J$  = 8.2 Hz, 6H), 0.87 (t,  $J$  = 7.3 Hz, 9H).  $^{13}\text{C}$  NMR (151 MHz, Chloroform- $d$ )  $\delta$  171.1, 165.3, 160.8, 157.1 (d,  $J$  = 248.3 Hz), 145.7, 136.7, 134.5 (d,  $J$  = 7.9 Hz), 133.9, 131.8, 129.7, 129.4 (d,  $J$  = 3.6 Hz), 128.4, 127.3, 126.3, 125.2, 123.8 (d,  $J$  = 18.7 Hz), 116.3 (d,  $J$  = 22.4 Hz), 47.3, 42.4, 37.8, 29.1, 27.5, 13.8, 9.8.  $[\text{C}_{39}\text{H}_{49}\text{FN}_4\text{O}_3\text{SnNa}^+]$  Mass (calc): 783.2703; Found: 783.2662.

## 1.3. NMR spectra

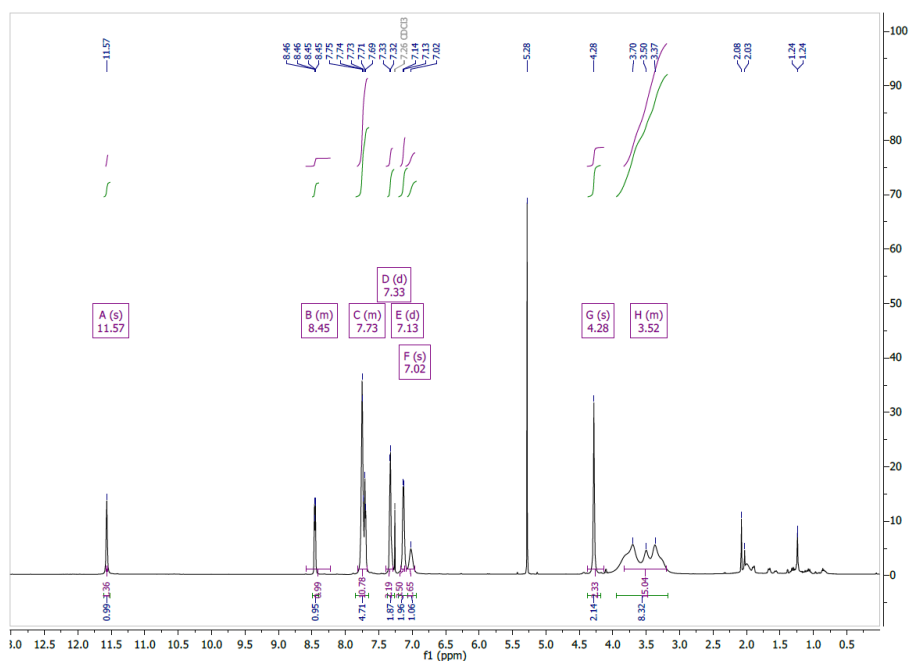

**Fig. S1A:**  $^1\text{H}$  NMR spectrum of 4-{3'-[4''-(4'''-iodobenzoyl)piperazine-1''-carbonyl]-4'-fluorobenzyl}-2H-phthalazin-1-one

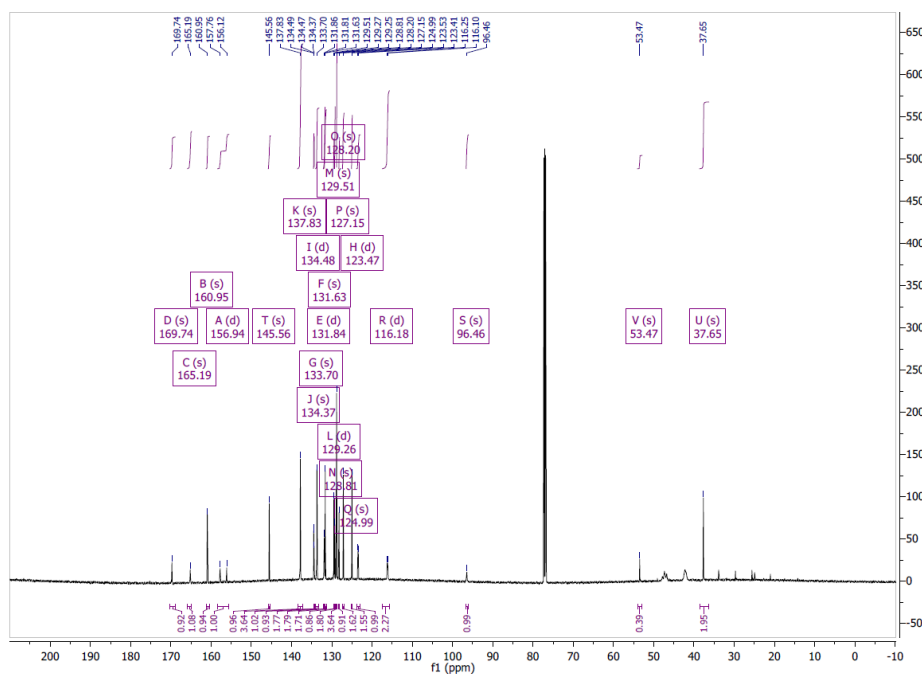

**Fig. S1B:**  $^{13}\text{C}\{^1\text{H}\}$  NMR spectrum of 4-{3'-[4''-(4'''-iodobenzoyl)piperazine-1''-carbonyl]-4'-fluorobenzyl}-2H-phthalazin-1-one

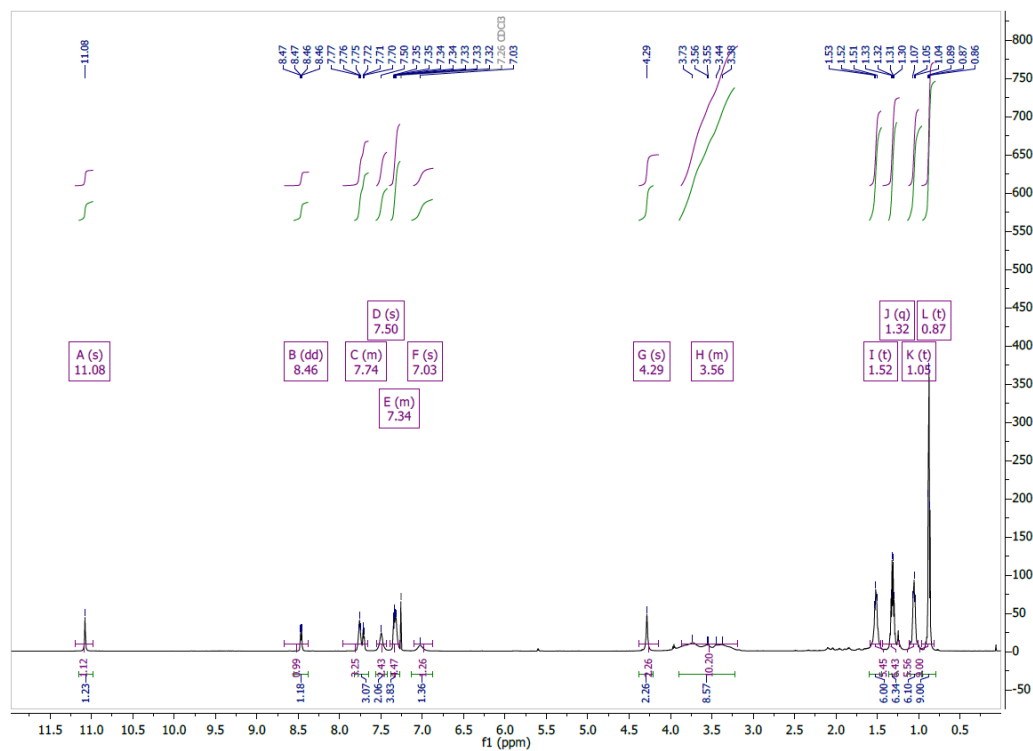

**Fig. S1C:**  $^1\text{H}$  NMR spectrum of 4-{3'-[4''-(4'''-tributylstannylbenzoyl)piperazine-1''-carbonyl]-4'-fluorobenzyl}-2H-phthalazin-1-one

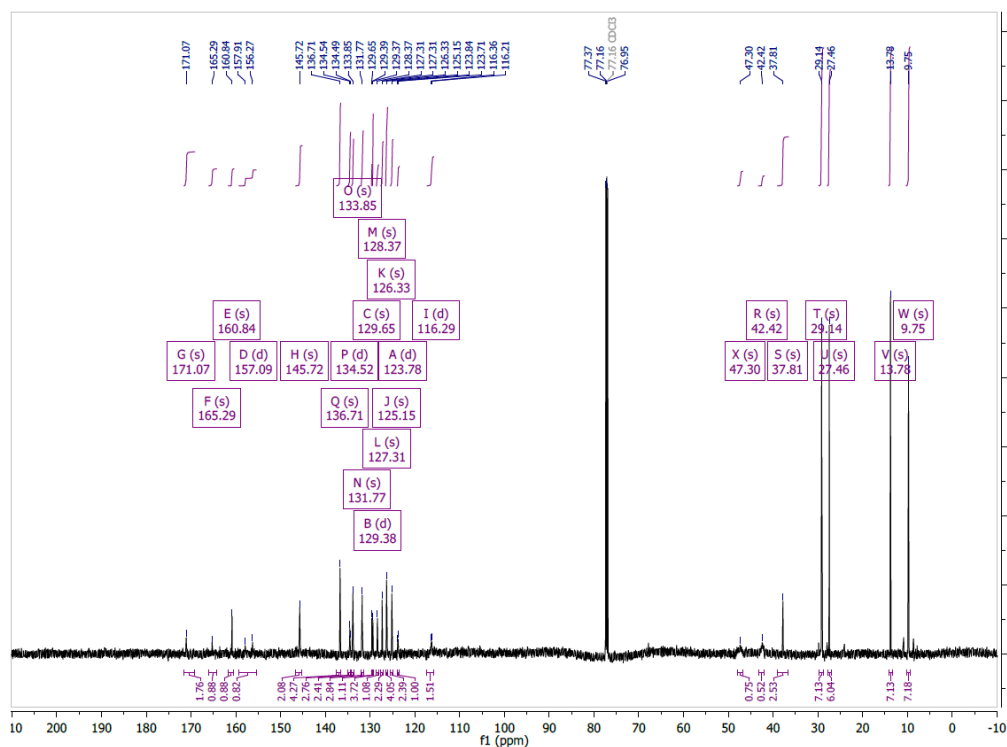

**Fig. S1D:**  $^{13}\text{C}\{^1\text{H}\}$  NMR spectrum of 4-{3'-[4''-(4'''-tributylstannylbenzoyl)piperazine-1''-carbonyl]-4'-fluorobenzyl}-2H-phthalazin-1-one

## 2. Supplementary Figures

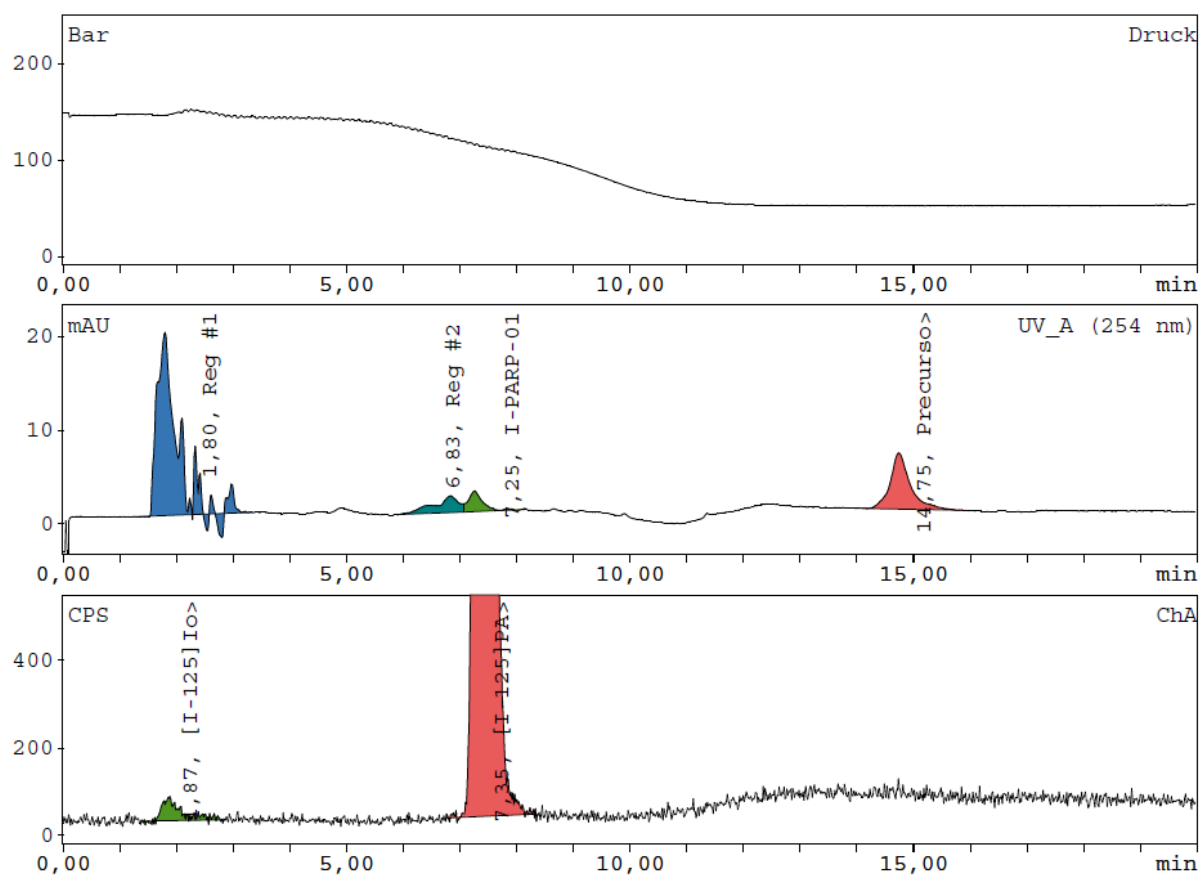

**Fig. S2A:** Quality control of [ $^{125}\text{I}$ ]-PARPi-01 using gradient Reverse Phase HPLC. HPLC system contains UV and gamma detection. **HPLC conditions:** LiChrospher 100 RP18 EC 5 $\mu\text{m}$ , 250x4 mm, Flow 1 mL/min, pressure ca. 140 bar, eluents: A:  $\text{CH}_3\text{CN}$ , B:  $\text{H}_2\text{O}$  (0.1% TFA, citrate), gradient: 0-2 min 40% A / 2-8 min 40% A  $\rightarrow$  100% A / 8-18 min 100% A / 18-20 min 40% A. UV absorbance: 254 nm. Retention times: [ $^{125}\text{I}$ ]iodide (2 min), [ $^{125}\text{I}$ ]PARPi-01 (7.5 min), labelling precursor (14.8 min). Radiochemical product purity in this example (20.08.2021) is 99.2 %.

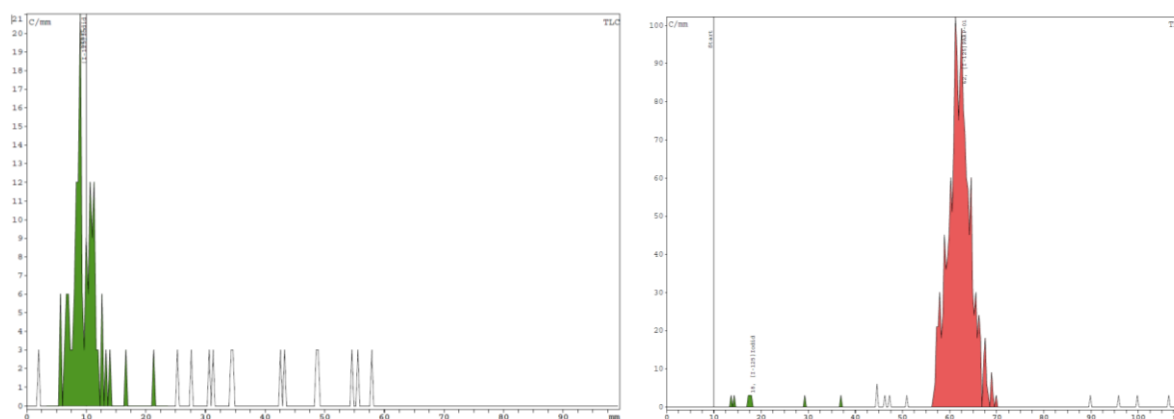

**Fig. S2B:** Comparison of  $^{125}\text{I}$  (green peak) vs  $^{125}\text{I}$ -PARPi-01 (red peak) in thin layer chromatography (TLC) followed by scanning using a radio-TLC scanner as quality control 3 months post synthesis upon storage at  $-20^{\circ}\text{C}$  (Solvent: Ethanol). No deiodination observed upon long term storage. **TLC run conditions:** Mobile phase: Acetone; Stationary phase: Silica on Aluminium backing.

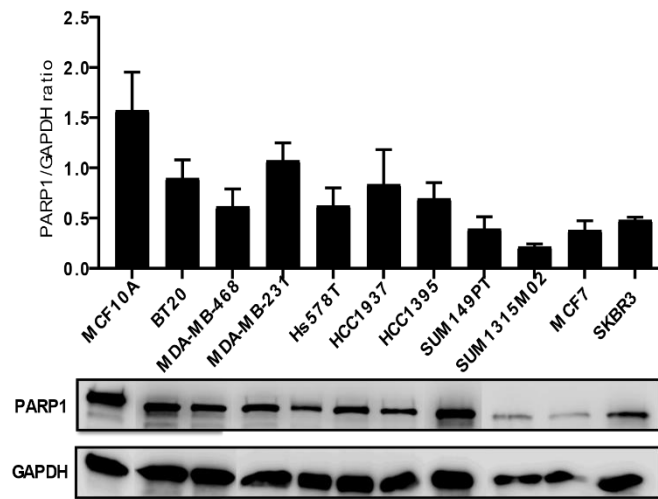

**Fig. S3A:** Western blot analysis of PARP1 expression in mammary epithelial control (MCF10A) and TNBC and breast cancer cell lines.



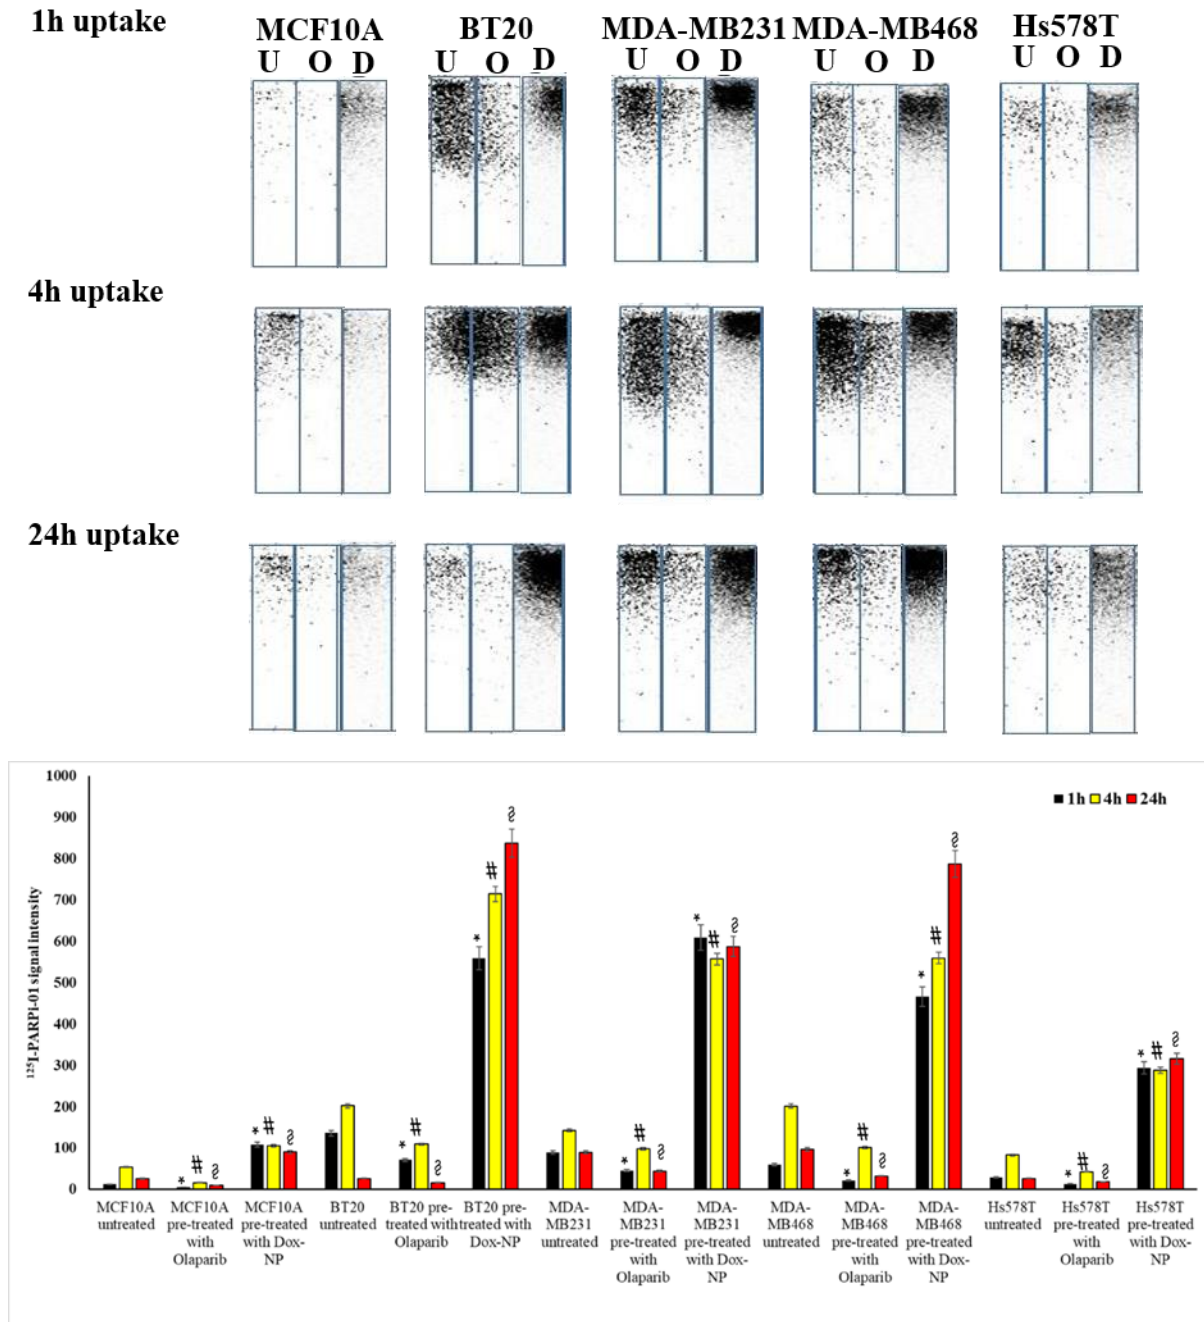

**Fig S3B:** Phosphor-imager (PI) analysis of radioactivity in nuclear lysates of representative cell lines run in SDS-PAGE. Untreated (U – above PI picture) cells were incubated with  $^{125}\text{I}$ -PARPi-01 without pre-treatment; Olaparib pre-treated (O – above PI picture) cells were treated with  $1\mu\text{M}$  Olaparib for 72hrs; Dox-NP (D – above PI picture) cells were pre-treated with  $100\text{nM}$  Dox-NP for 6hrs. After incubation with  $^{125}\text{I}$ -PARPi-01 ( $1\text{MBq}/10^6$  cells) for 1hr, 4hrs and 24hrs cells were harvested, fractionated and nuclear lysates were run in SDS-PAGE. The radioactivity was detected and visualised using Phosphor-imager. As opposed to the control MCF10A (benign mammary epithelial) the breast cancer cell lines show enhanced uptake upon Dox-NP pre-treatment. Quantification of the signal intensity was performed using Image Quant TL Toolbox v8.1. Statistical analysis performed using 2-way ANOVA using Dunnetts post-hoc test. \* $P < 0.001$  at 1h; #  $P < 0.001$  at 4h;  $^{\S}P < 0.001$  at 24h. Significance test was performed within each cell-line.

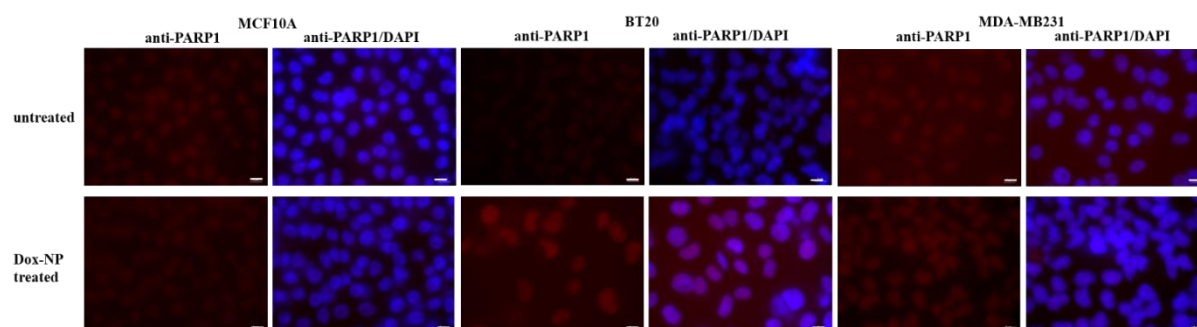

**Fig. S4:** Immunofluorescence microscopy of PARP1 expression in untreated and DOX-NP (100 nM for 6 hrs) treated benign and malignant breast cells. Scale bars represent 5 μm.

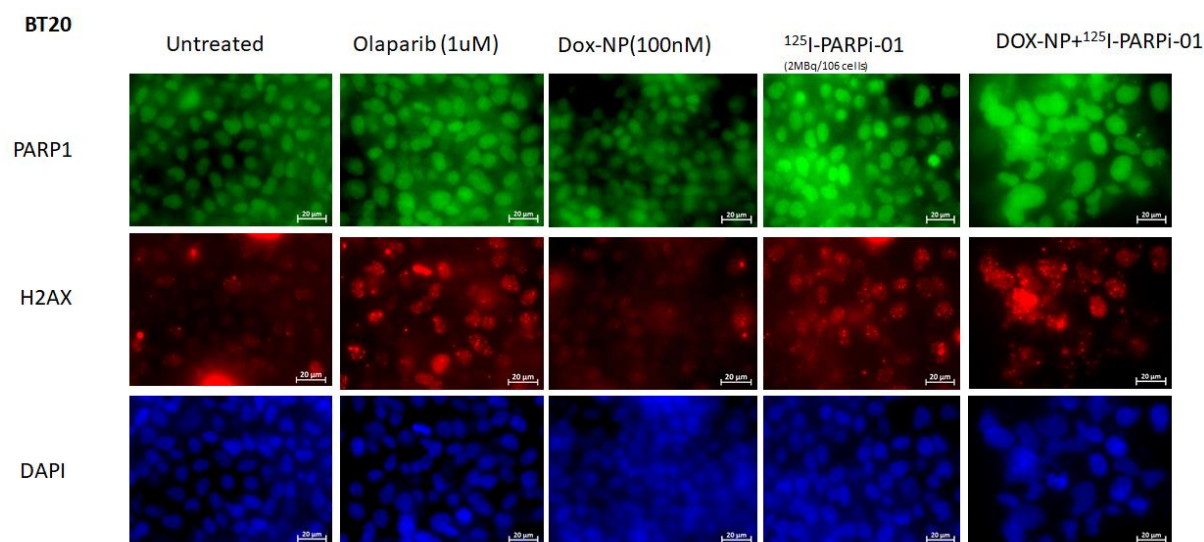

**Fig. S5:** Representative Immunofluorescence images of BT20 cell-line treated with Olaparib (72 hrs), Dox-NP (6 hrs) or [<sup>125</sup>I]-PARPi-01 (2MBq/10<sup>6</sup> cells, 72hrs) or combination of Dox-NP pretreatment followed by [<sup>125</sup>I]-PARPi-01 and stained for PARP1 expression levels (green), H2AX foci (red) along with DAPI (nucleus).

**A**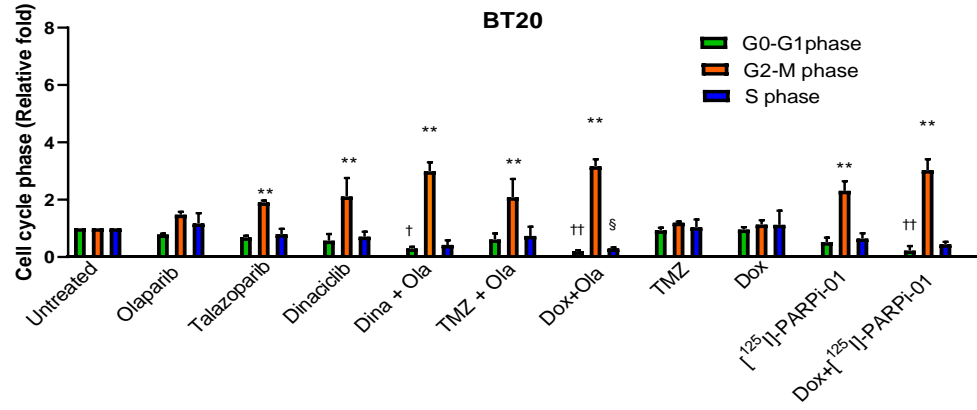**B**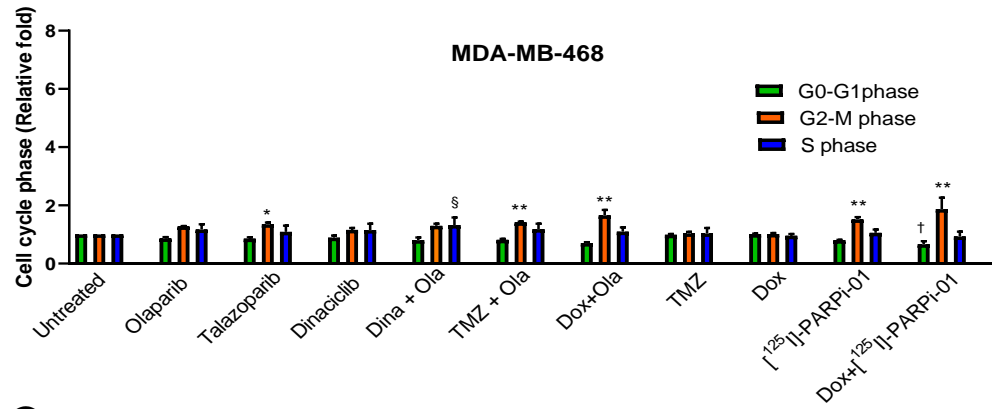**C**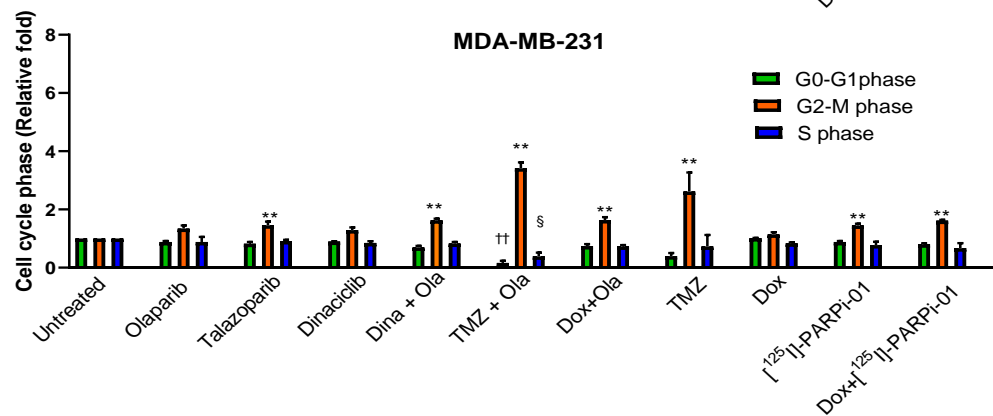**D**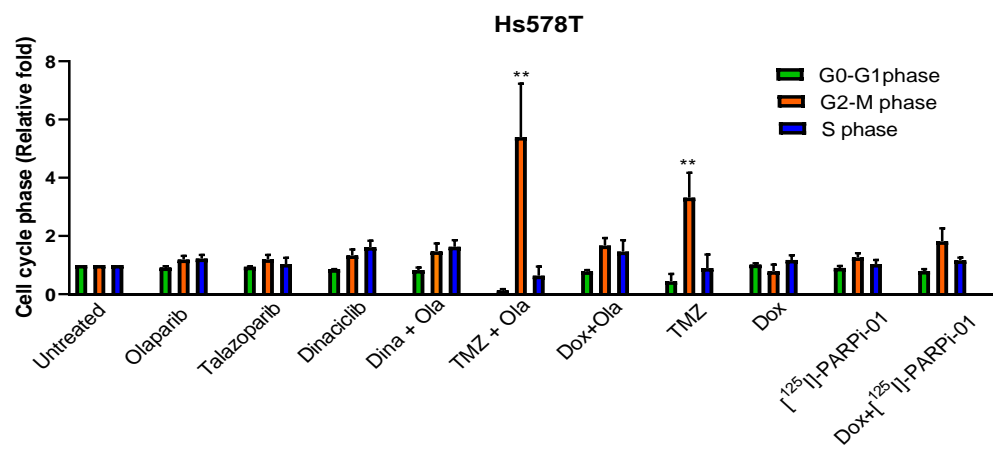

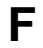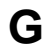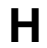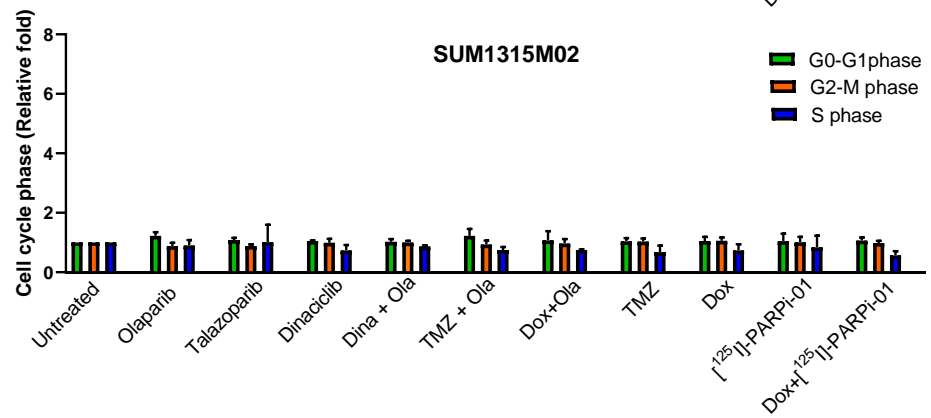

I

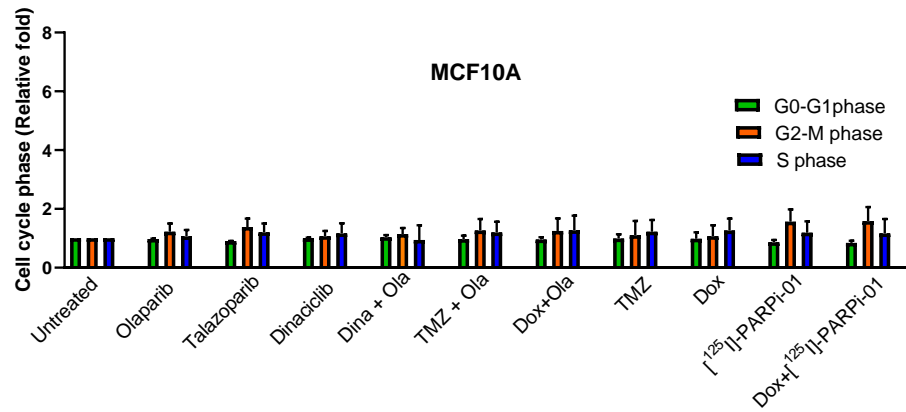

J

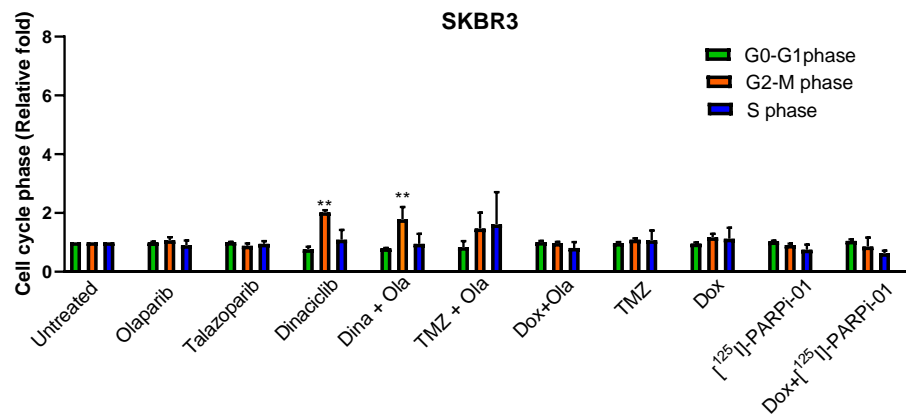

K

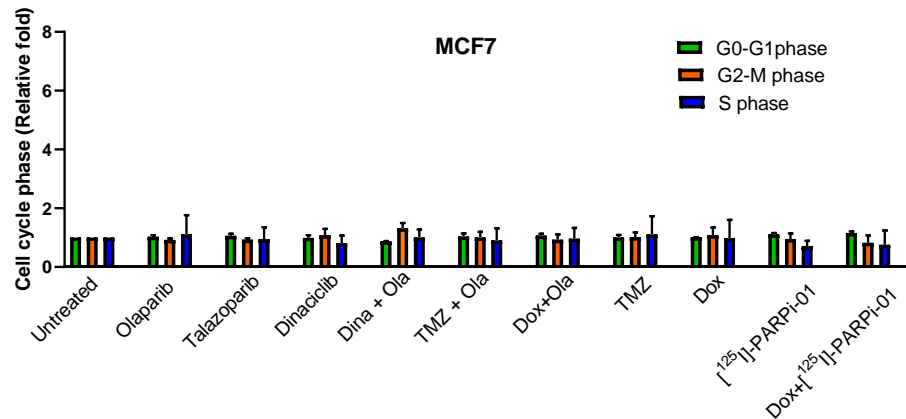

**Fig. S6:** Comparison of cell cycle phases upon treatments with olaparib (ola, 1  $\mu$ M, 72 hrs), talazoparib (tala, 10 nM, 72 hrs), Dinaciclib (Dina, 5  $\mu$ M, 72 hrs), temozolomide (TMZ, 50  $\mu$ M, 48 hrs), Dox-NP (Dox, 100 nM, 6 hrs), [<sup>125</sup>I]-PARP-01 and combination treatments: Dina (5 nM)+Ola (1  $\mu$ M) (72 hrs), TMZ (48 hrs)+Ola (24 hrs), Dox-NP (6 hrs)+Ola (60 hrs) in each cell line **A.** BT20. **B.** MDA-MB-468 **C.** MDA-MB-231, **D.** Hs578T; **E.** HCC1937; **F.** HCC1395; **G.** SUM149PT; **H.** SUM1315M02; **I.** MCF10A; **J.** SKBR3; **K.** MCF7. ; Statistical analysis was calculated using 2-way ANOVA and Bonferroni post-hoc test. \* indicates significances between G2-M phase, <sup>†</sup> indicates significance between G0-G1 phase and <sup>§</sup> indicates significance between S phase. (\*P<0.05; \*\*P<0.001; <sup>†</sup>P<0.05; <sup>††</sup>P<0.001; <sup>§</sup>P<0.05).

A

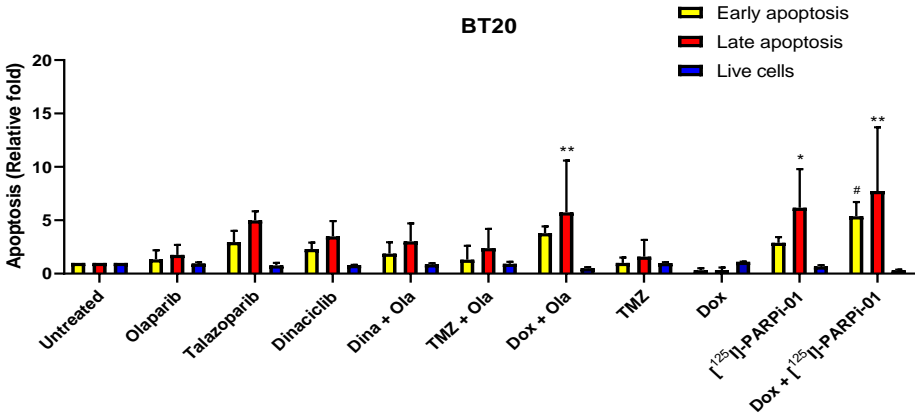

B

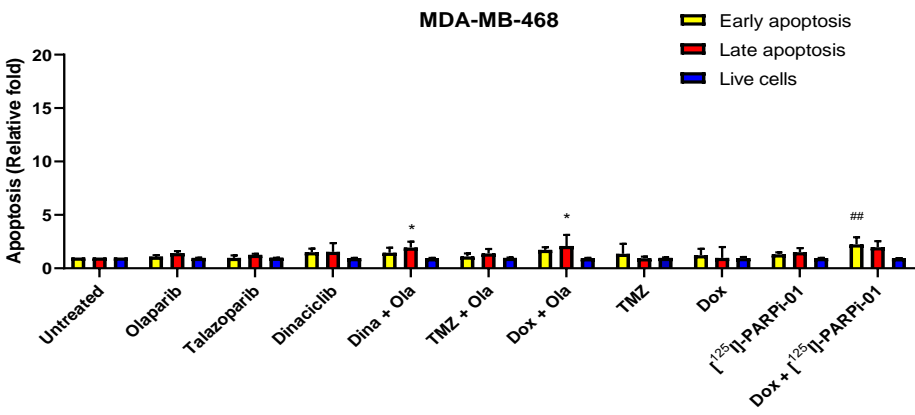

C

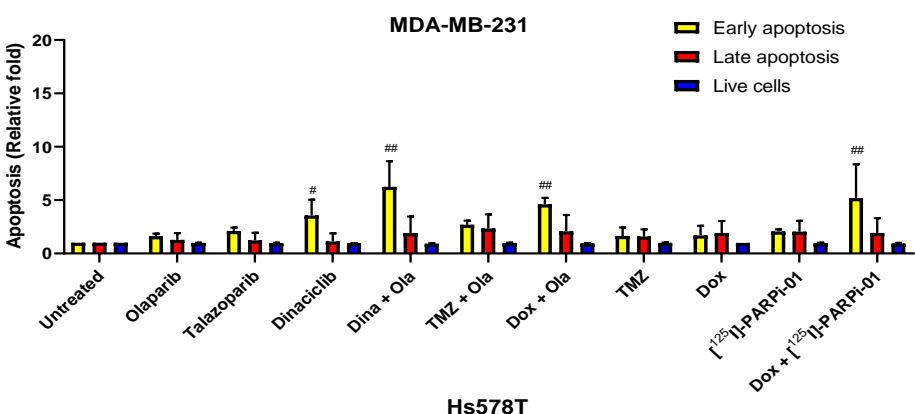

D

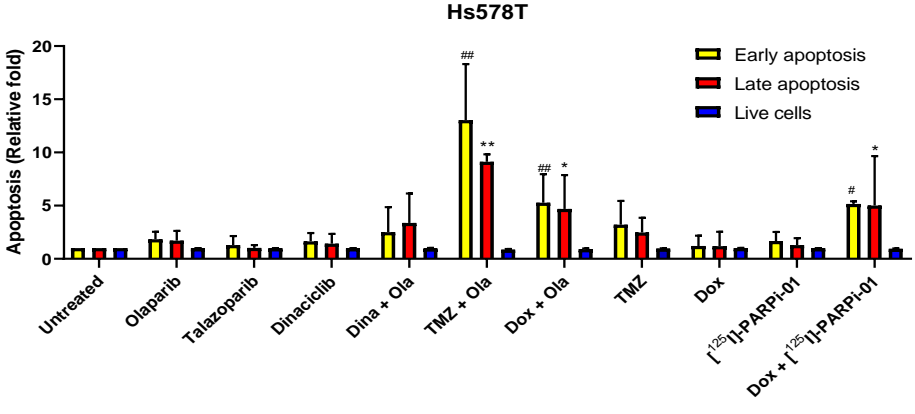

E

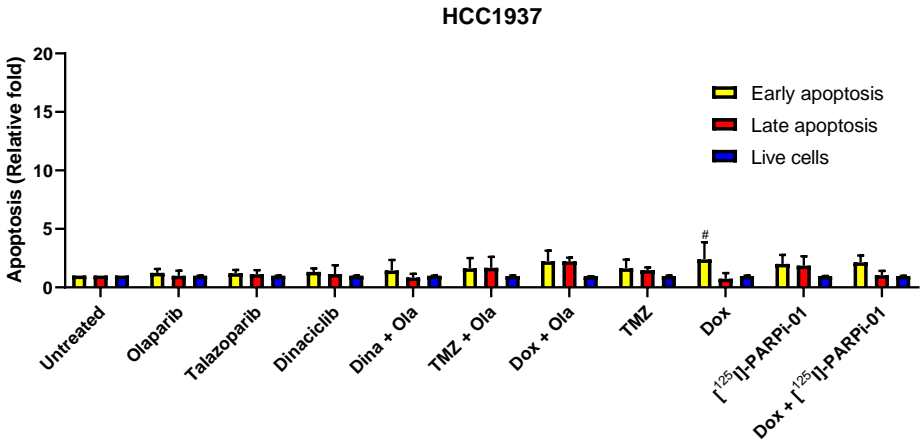

F

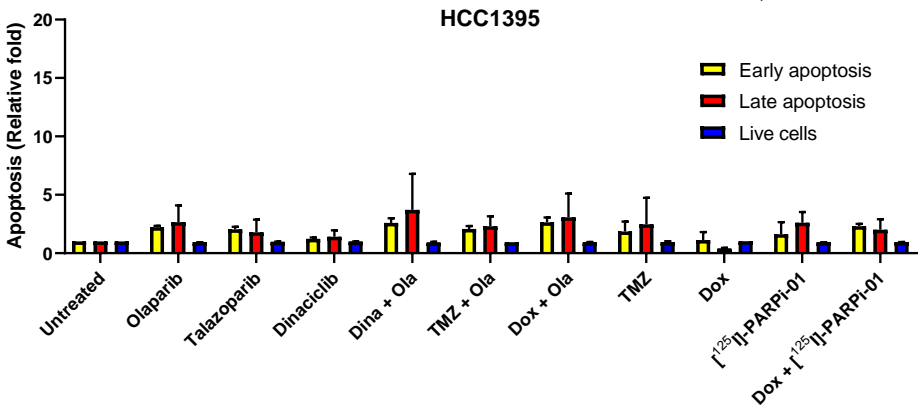

G

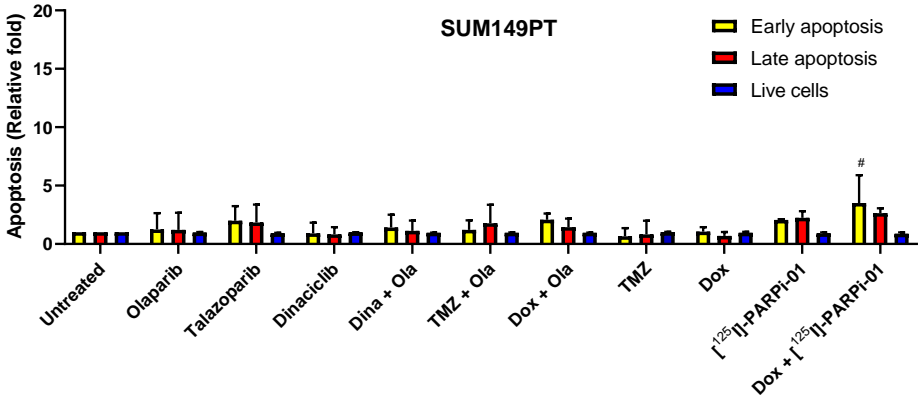

H

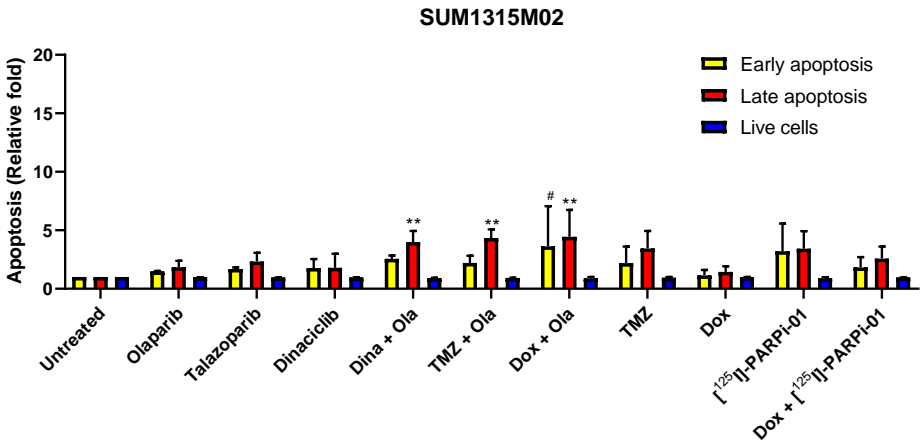

I

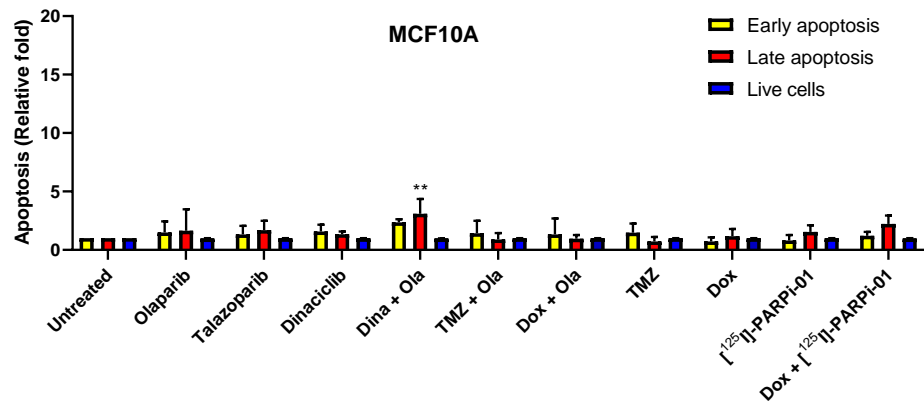

J

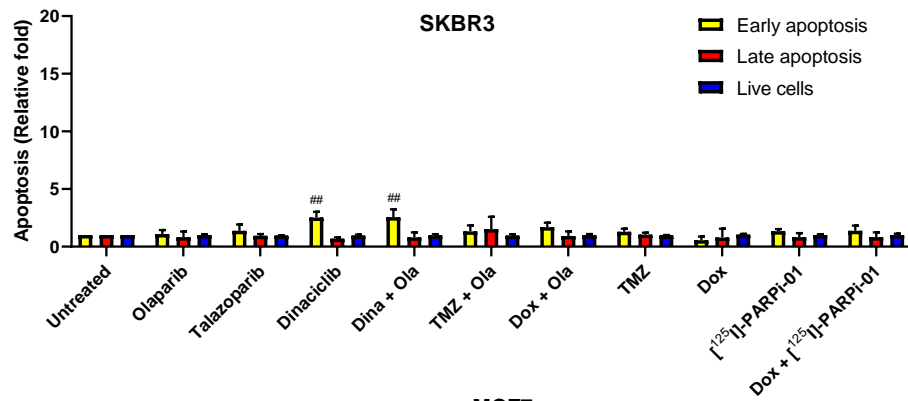

K

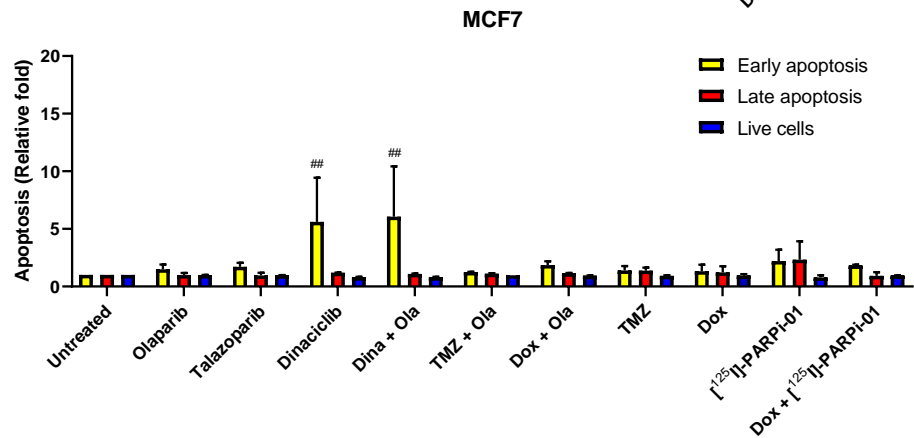

**Fig. S7:** Comparison of early and late apoptotic populations and live cell population upon treatments with olaparib (ola, 1  $\mu$ M, 72 hrs), talazoparib (tala, 10nM, 72 hrs), Dinaciclib (Dina, 5  $\mu$ M, 72 hrs), temozolomide (TMZ, 50  $\mu$ M, 48hrs), Dox-NP (Dox, 100 nM, 6 hrs). [<sup>125</sup>I]-PARP-01 and combination treatments: Dina (5nM)+Ola (1 $\mu$ M) (72 hrs), TMZ (48 hrs)+Ola(24 hrs), Dox-NP(6 hrs)+Ola(60 hrs) in each cell line **A.** BT20. **B.** MDA-MB-468 **C.** MDA-MB-231, **D.** Hs578T; **E.** HCC1937; **F.** HCC1395; **G.** SUM149PT; **H.** SUM1315M02; **I.** MCF10A; **J.** SKBR3; **K.** MCF7. Statistical analysis was calculated using 2-way ANOVA and Bonferroni post-hoc test. \* indicates significances between Late apoptosis, # indicates significance between Early apoptosis. (\*P<0.05; \*\*P<0.001; #P<0.05; ###P<0.001).



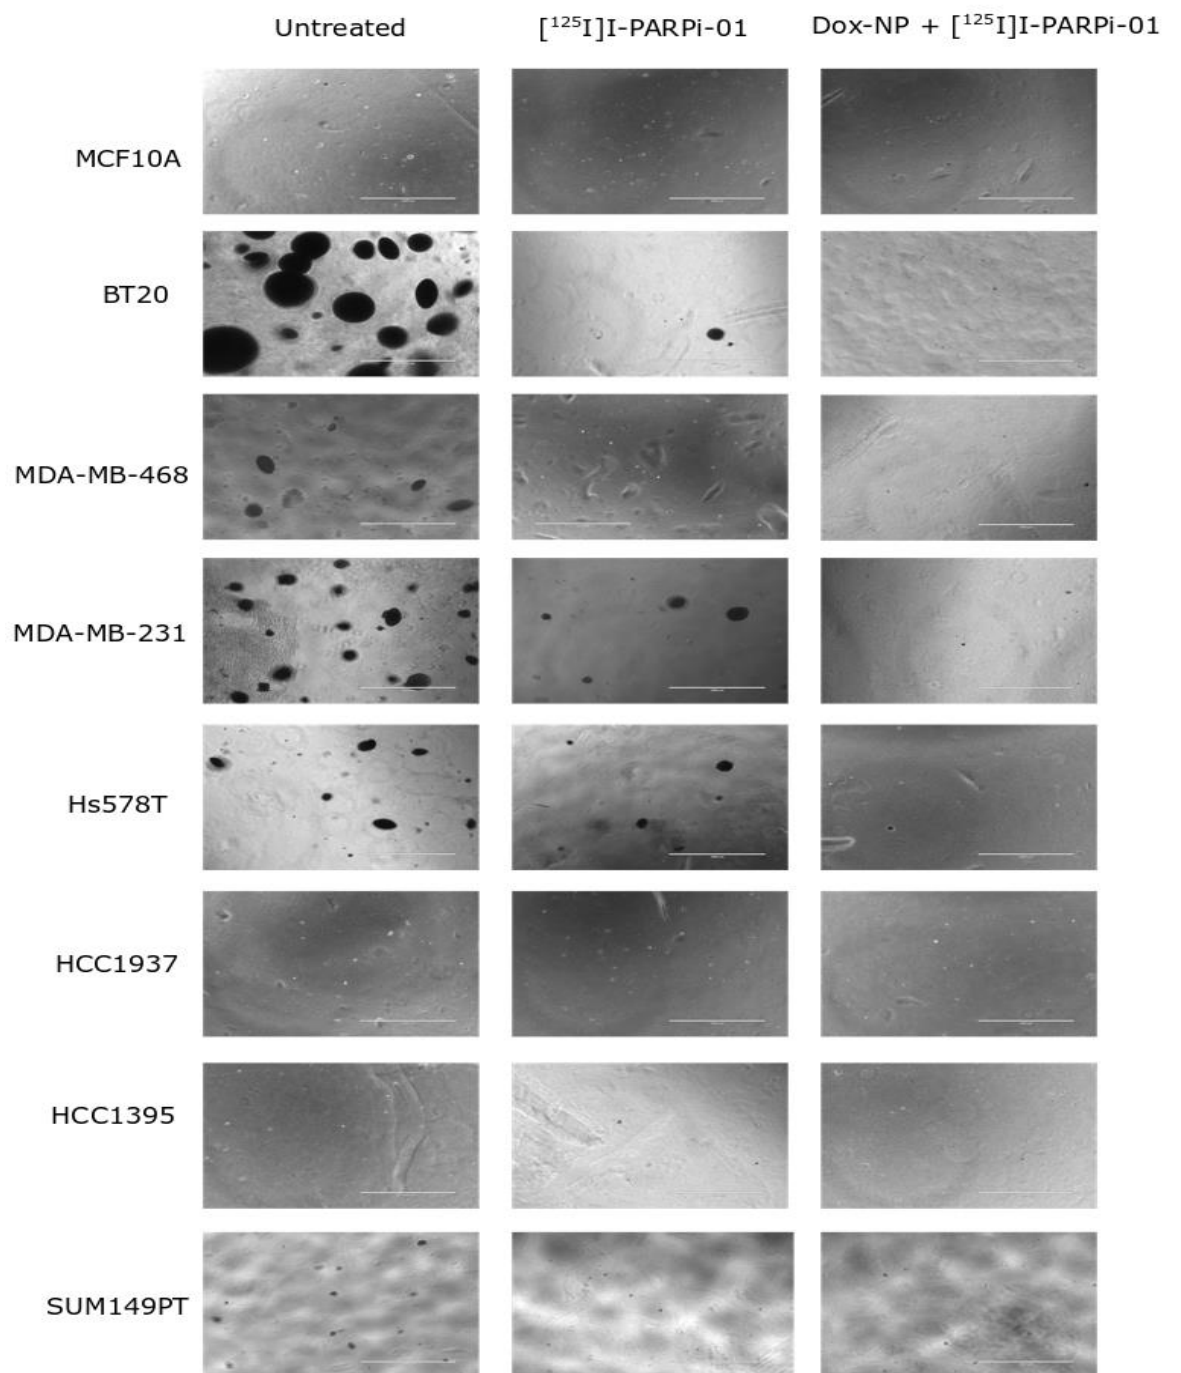

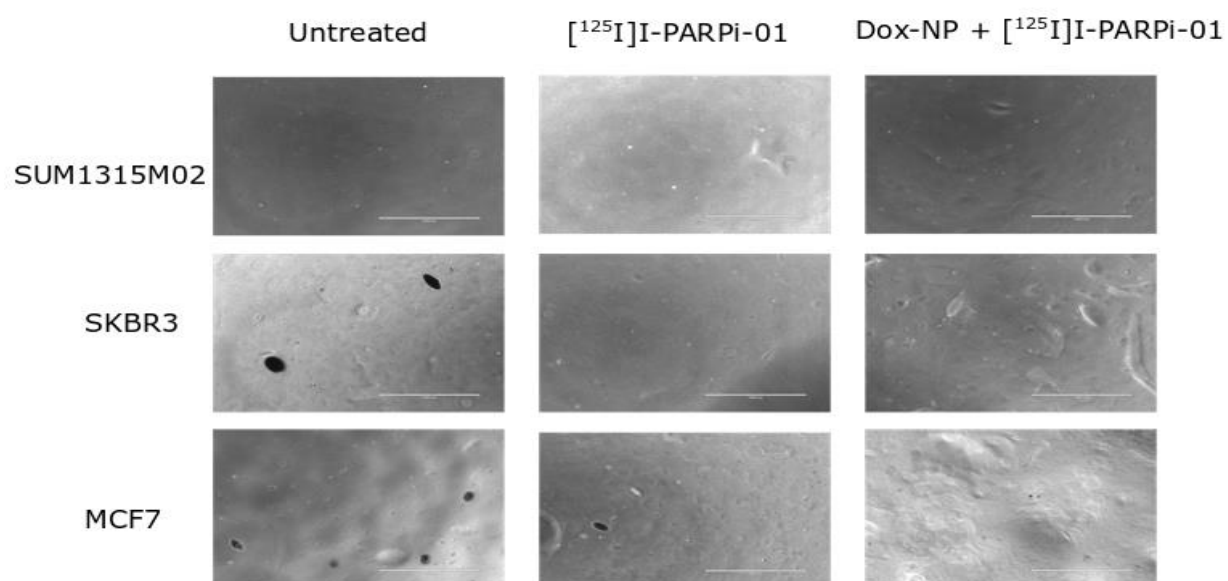

**Fig. S8:** Images of colony formation of cell-lines upon growth in soft-agar for 21 days post treatment with [<sup>125</sup>I]-PARPi-01 (2MBq/10<sup>6</sup> cells, 72 hrs) or combination of Dox-NP pre-treatment (100nM, 6 hrs) followed by [<sup>125</sup>I]-PARPi-01 (2MBq/10<sup>6</sup> cells, 72 hrs).
